# Supplementary material for: The degradation behaviour of nine diverse contaminants in urban surface water and wastewater prior to water treatment
Source: Royal Society of Chemistry journal article supplement (doi:10.1039/c5em00338e), 2015-01-01
Supplement: c5em00338e1.pdf [file c5em00338e1.pdf]

## 450 Electronic Supplementary Information

451

### 452 The degradation behaviour of nine diverse contaminants in 453 urban surface water and wastewater prior to water treatment

454 Guillaume Cormier,<sup>a</sup> Benoit Barbeau,<sup>b</sup> Hans Peter H. Arp<sup>c</sup> and Sébastien Sauvé<sup>\*a</sup>

455

456 <sup>a</sup> Department of Chemistry, Université de Montréal, C.P. 6128, Succursale Centre-Ville, Montréal, QC, Canada, H3C 3J7. Fax: +1-514-  
457 343-2468; Tel: +1-514-343-6749; E-mail:sebastien.sauve@umontreal.ca

458 <sup>b</sup> NSERC Industrial Chair on Drinking Water, Department of Civil, Mining and Geological Engineering, Polytechnique Montréal, C.P. 6079,  
459 Succursale Centre-Ville, Montréal, QC, Canada H3C 3A7. Tel: +1-514-340-5918; E-mail:benoit.barbeau@polymtl.ca

460 <sup>c</sup> Norwegian Geotechnical Institute (NGI), P.O. Box 3930 Ullevål Stadion, N-0806 Oslo, Norway

461

462

463

464

465

## 466 Contents

|     |                                                                                        |    |
|-----|----------------------------------------------------------------------------------------|----|
| 467 | Electronic Supplementary Information.....                                              | 1  |
| 468 | S1. The maintenance of oxic conditions .....                                           | 2  |
| 469 | S2. Viability of the microbial composition of the raw wastewater systems in time ..... | 3  |
| 470 | S3. Results of potential long term compound losses by adsorption on vessels .....      | 4  |
| 471 | S4. Influence of biocides on the analytical variability .....                          | 5  |
| 472 | S5. Parameters of the analytical method .....                                          | 7  |
| 473 | S6. Quality assurance and validation of the analytical method.....                     | 9  |
| 474 | S7. Degradation results .....                                                          | 11 |
| 475 | S8. Literature Review of Aquatic Degradation Data for the Studied Compounds .....      | 13 |
| 476 | References .....                                                                       | 18 |

477

478

479 S1. The maintenance of oxic conditions

480 Preliminary observations have showed that in conditions similar to the ones of the degradation  
481 assays used here, bubbling air through each bottle 60 minutes per day would progressively  
482 evaporate water, which would lead to an increase in concentration in the absence of degradation  
483 or water-refilling. Our measured concentration of atrazine were increasing within time and the  
484 concentration of E2 were stable while we were expecting it to decrease (through degradation).  
485 This effect was not important on a short period but was noticeable for longer periods (few  
486 weeks). A correction factor has hence been used to correct the quantified concentrations of the  
487 target compounds, to prevent them being biased to high due to water evaporation. We note that  
488 volatilization is not an issue for the studied compounds, due to their low Henry's law constant  
489 (Table 2 in the main text), which warrants their classification as being non-volatile from water.  
490 The correction factor was used every time we were analyzing the target compounds in the  
491 degradation assays and can be summarised as follows:

492

493

$$[C]_r = \gamma [C]_m$$

494 Where

- 495 •  $[C]_r$  is the real concentration of the compound in  $\mu\text{g L}^{-1}$
- 496 •  $[C]_m$  is the concentration measured by the analytical technique in  $\mu\text{g L}^{-1}$
- 497 •  $\gamma$  is the correction factor

498

499

$$m_{T_n} = M_{T_n} - v$$

$$\gamma = \frac{m_{T_n} + (0.5(n+1))}{m_{T_0}}$$

500

501

502 Where

- 503 •  $m_{T_n}$  is the mass of the matrix in mg after the withdrawal of the aliquot at  $T_n$
- 504 •  $M_{T_n}$  is the sum of the mass of the bottle and the matrix in mg after the  
505 withdrawal of the aliquot at  $T_n$
- 506 •  $v$  is the mass of the empty bottle in mg
- 507 •  $(0.5(n+1))$  is the correction on  $m_{T_n}$  for the taken aliquot of 0.5 mg (500  $\mu\text{L}$ ) at every  $T_n$

508

509 S2. Viability of the microbial composition of the raw wastewater  
510 systems in time

511 The microbial lag phase is the period of time in which the bacterial population of a system  
512 adapts itself to the biodegradable compound(s). During this period, no biodegradation is  
513 observed. The OECD standardised protocol (309 – simulation biodegradation test) that was  
514 followed states that a system is not considered viable in terms of active bacterium if the lag  
515 phase exceeds 60 days and no biodegradation is observed until 90 days, in which case the  
516 studied system has depleted and a renewal is necessary to continue the studies. The results of  
517 the laboratory bench-scale experiment measuring the biological degradation of the target  
518 compounds in raw wastewaters showed that the studied raw wastewaters were  
519 microbiologically viable during all the duration of the biodegradation experiment, the  
520 biodegradation starting no later than the 71th day.

521 A measurement of the viable bacterium in the studied raw wastewaters at the 38<sup>th</sup> day also  
522 supports this conclusion (Table S1).

523 **Table S1. Bacterial count in the studied raw wastewaters initially and after 38 days of**  
524 **incubation.**

| Raw wastewater | T <sub>0</sub>         | T = 38 days of biodegradation experiment |                        |
|----------------|------------------------|------------------------------------------|------------------------|
|                | viable bacteria (nb/L) | viable bacteria (nb/L)                   | total bacteria (nb/L)  |
| 4 °C           | 2.09 x10 <sup>10</sup> | 2.99 x10 <sup>9</sup>                    | 1.01 x10 <sup>10</sup> |
| 21.5 °C        | 2.09 x10 <sup>10</sup> | 6.94 x10 <sup>9</sup>                    | 1.13 x10 <sup>10</sup> |

525

### S3. Results of potential long term compound losses by adsorption on vessels

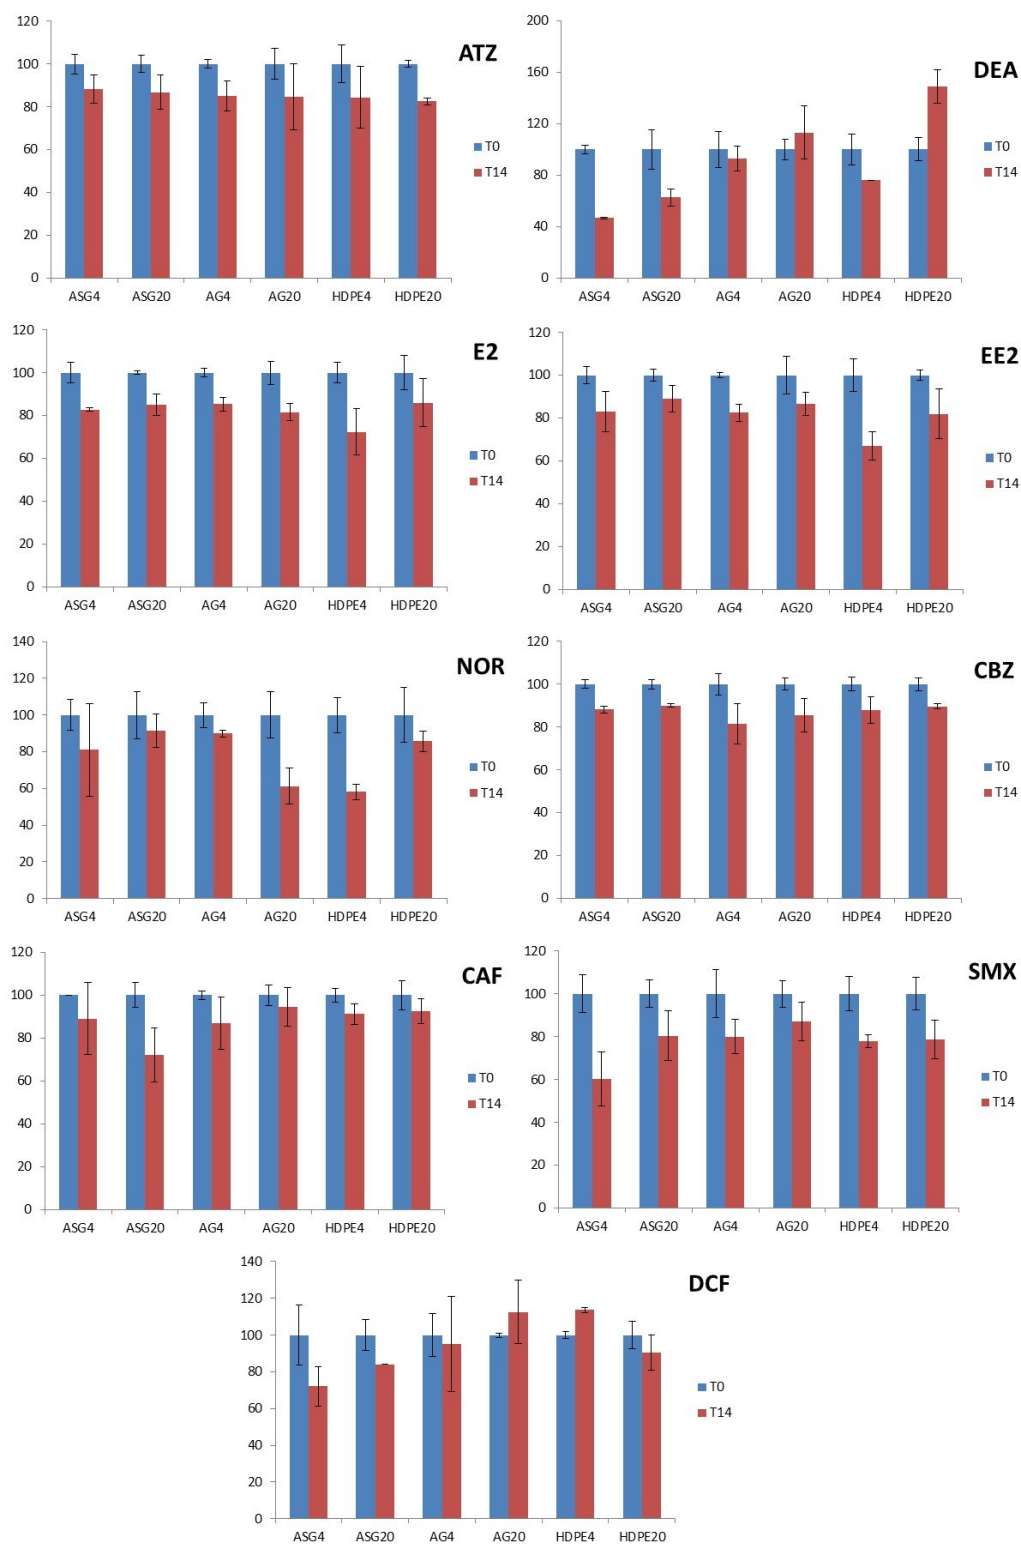

**Figure S1. Compound losses by sorption on internal bottle surface after 14 days of incubation at 4 and 20 °C for an initial concentration of  $\approx 400 \mu\text{g L}^{-1}$  in distilled water where ASG = amber silanized glass bottle, AGB = amber glass bottle & HDPE = HDPE bottles.**

## S4. Influence of biocides on the analytical variability

A comparison was made between a sample of raw wastewater and a sample of acidified (pH 4.5) wastewater spiked with 150  $\mu\text{M}$  of  $\text{CuSO}_4$  and  $\text{AgNO}_3$  to investigate if the conditions of the sample with biocides influenced the variability of the analysis of the 9 target compounds.

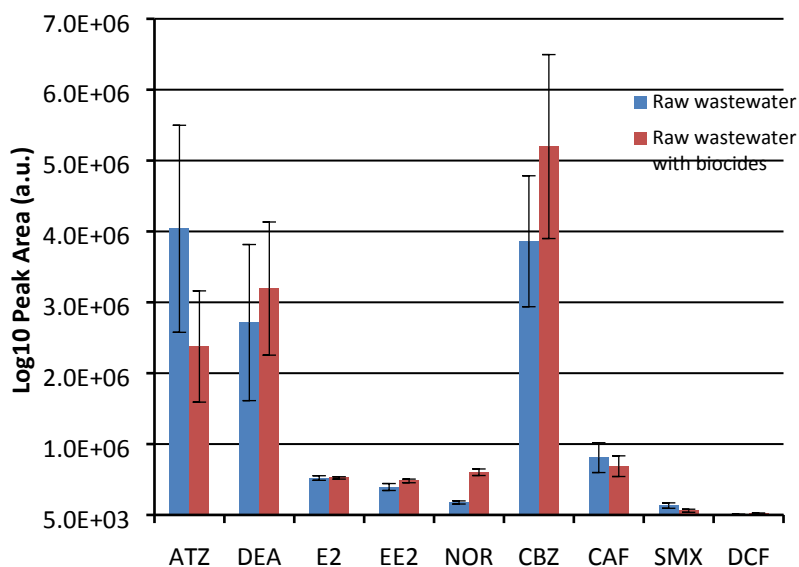

**Figure S2. Log<sub>10</sub> peak area (a.u.) of the nine target compounds at 400  $\mu\text{g L}^{-1} \pm \text{SD}$  (n=5) in raw wastewater and in acidified (with formic acid) wastewater spiked with 150  $\mu\text{M}$  of  $\text{CuSO}_4$  and  $\text{AgNO}_3$ .**

The results (**Figure S2**) showed that the new conditions did not change the peak areas for ATZ, DEA, CBZ, E2, EE2 and CAF, these peak areas being not statistically different from raw to wastewater pH 4.5 with biocides. The acidification and the addition of biocides respectively tripled and doubled the peak areas of NOR and DCF, which should not affect the variability of their signal. The peak area decreased only for SMX, the signal passing from  $10^5$  to  $10^4$  when acidifying and adding biocides. The latter signal being quite low, this may influence the variability of the signal. The response ratio is defined by the ratio of the peak area of the target compound on the peak area of its internal standard. Since it is the parameter used to quantify the compounds, the influence of the acidification and the addition of biocides on it was also measured.

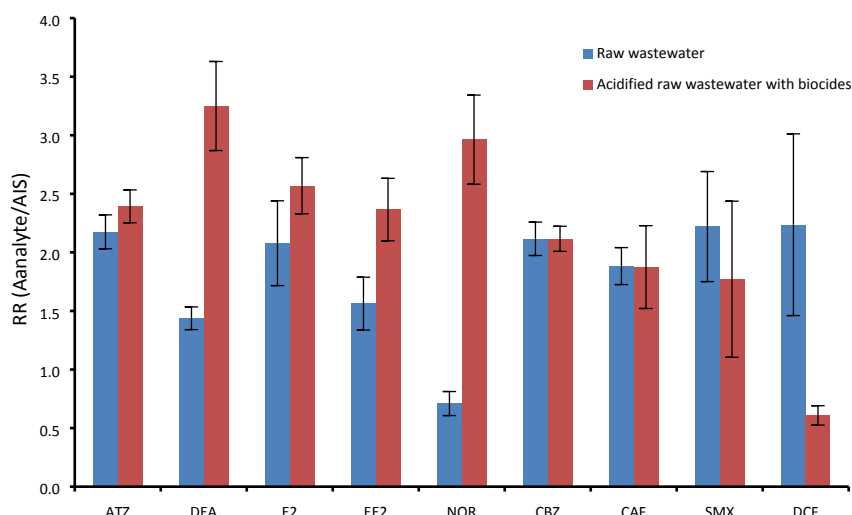

**Figure S3. Response Ratio (RR) of the 9 target compounds at  $400 \mu\text{g L}^{-1} \pm \text{SD}$  ( $n=5$ ) in raw wastewater and in acidified (with formic acid) wastewater spiked with  $150 \mu\text{M}$  of  $\text{CuSO}_4$  and  $\text{AgNO}_3$ .**

Results (Figure S3) showed that the response ratios of DEA, EE2, NOR and DCF are statistically different when acidifying and adding biocides, which means that a calibration curve per condition (one for samples of raw wastewater and one for wastewater pH 4.5 + biocides) had to be done before each quantification. Results also showed that the acidification and addition of biocides did not affect the quantification of SMX, the RRs being statistically identical. The standard deviations of the RRs of the acidified wastewater samples spiked with biocides were deemed acceptable.

## S5. Parameters of the analytical method

**Table S2 LDTD parameters for the quantification of 9 target analytes in Positive (+) Ionization Mode by LDTD-APCI-MS/MS**

| LDTD Method Characteristics <sup>A</sup> |                         |
|------------------------------------------|-------------------------|
| Laser power at 980 nm & 20 W             | 0.30                    |
|                                          | 2 sec at 0%             |
| Laser pattern                            | 1 sec from 0 to 30%     |
|                                          | 0.01 sec from 30% to 0% |
| Capillary temperature                    | 50 °C                   |
| Carrier gas flow                         | 3.0 L min <sup>-1</sup> |
| Ion sweep gas                            | 0.3 a.u.                |
| Sheath gas                               | 0                       |
| Auxiliary gas                            | 0                       |
| Skimmer offset                           | 0                       |
| Vaporizer temperature                    | 0                       |

<sup>A</sup>All the methods have the same characteristics: there are 4 because the LDTD system cannot take more than 8 transitions (4 compounds) at the same time

**Table S3 LDTD methods and internal standards associated for the quantification of target compounds by LDTD-APCI-MS/MS**

| LDTD Method <sup>A</sup> (#) | Compound | Internal Standard                    |
|------------------------------|----------|--------------------------------------|
| 1                            | ATZ      | [ <sup>13</sup> C <sub>3</sub> ]-ATZ |
|                              | DEA      |                                      |
|                              | E2       |                                      |
| 2                            | EE2      | [ <sup>13</sup> C <sub>6</sub> ]-E2  |
|                              | NOR      |                                      |
|                              | CBZ      |                                      |
| 3                            | CAF      | [ <sup>13</sup> C <sub>3</sub> ]-CAF |
|                              | SMX      |                                      |
| 4                            | SMX      | [ <sup>13</sup> C <sub>6</sub> ]-SMX |
|                              | DCF      |                                      |

<sup>A</sup>All the methods have the same characteristics: there are 4 because the LDTD system cannot handle more than 8 transitions (4 compounds) simultaneously (i.e. one injection peak lasts only for a few seconds at most).

**Table S4 MS/MS parameters for the quantification of 9 target analytes in positive (+) ionization mode by LDTD-APCI-MS/MS**

| Compound                             | Ionisation mode | Precursor Ion [M+H] <sup>+</sup> (m/z) | Product Ion (m/z) | TL (V) | CE (eV) |
|--------------------------------------|-----------------|----------------------------------------|-------------------|--------|---------|
| ATZ                                  | (+)             | 216.12                                 | 131.9<br>173.9    | 70     | 23      |
| DEA                                  | (+)             | 188.1                                  | 103.9<br>145.9    | 60     | 27      |
| E2                                   | (+)             | 255.18                                 | 133.1<br>159.1    | 70     | 18      |
| EE2                                  | (+)             | 279.1                                  | 133.1<br>159.1    | 55     | 18      |
| NOR                                  | (+)             | 299.205                                | 109.1<br>91.1     | 89     | 39      |
| CBZ                                  | (+)             | 237.12                                 | 192.1<br>194.1    | 65     | 24      |
| CAF                                  | (+)             | 195.12                                 | 109.9<br>137.9    | 69     | 21      |
| SMX                                  | (+)             | 254.06                                 | 107.9<br>156.1    | 55     | 24      |
| DCF                                  | (+)             | 296.01                                 | 215.0<br>249.9    | 63     | 12      |
| [ <sup>13</sup> C <sub>3</sub> ]-AT  | (+)             | 219.11                                 | 106.0<br>177.0    | 71     | 30      |
| [ <sup>13</sup> C <sub>6</sub> ]-E2  | (+)             | 261.18                                 | 133.1<br>159.0    | 73     | 20      |
| CBZ-d <sub>10</sub>                  | (+)             | 247.17                                 | 202.1<br>204.1    | 72     | 36      |
| [ <sup>13</sup> C <sub>3</sub> ]-CAF | (+)             | 198.111                                | 112.1<br>140.1    | 72     | 24      |
| [ <sup>13</sup> C <sub>6</sub> ]-SMX | (+)             | 260.081                                | 114.1<br>162.0    | 61     | 22      |
| DCF-d <sub>4</sub>                   | (+)             | 300.26                                 | 219.1<br>254.1    | 69     | 21      |



## S6. Quality assurance and validation of the analytical method

**Table S5 Replicability and recovery for the wastewaters tested for an added concentration of 200 µg L<sup>-1</sup> (n = 5)\***

| Compound | Replicability                      |                          |         | Recovery                           |                         |                    |
|----------|------------------------------------|--------------------------|---------|------------------------------------|-------------------------|--------------------|
|          | Amount found [µg L <sup>-1</sup> ] | SD (µg L <sup>-1</sup> ) | RSD (%) | Amount found [µg L <sup>-1</sup> ] | % Bias vs amount spiked | % vs amount spiked |
| ATZ      | 198                                | 7,6                      | 3,8     | 198                                | -0.8                    | 99.2               |
| DEA      | 164                                | 11,2                     | 6,8     | 168                                | -15.9                   | 84.1               |
| E2       | 205                                | 15,7                     | 7,7     | 164                                | -18.1                   | 81.9               |
| EE2      | 201                                | 20,5                     | 10,2    | 208                                | 4.0                     | 104                |
| NOR      | 193                                | 26,9                     | 14,0    | 167                                | -16.5                   | 83.5               |
| CBZ      | 210                                | 18,7                     | 8,9     | 172                                | -14.2                   | 85.8               |
| CAF      | 192                                | 30,5                     | 15,8    | 228                                | 14.0                    | 114                |
| SMX      | 173                                | 28,3                     | 16,3    | 251                                | 25.3                    | 125                |
| DCF      | 193                                | 39,8                     | 20,7    | 206                                | 3.2                     | 103                |

\*Test were carried out separately with 2 different samples.

The replicability of the method describes the agreement of a set of results among themselves when the analyst, the instrument and the day of analysis is the same. It was tested in the dirtiest studied water, i.e. the raw wastewater (PST effluent). There are many ways to calculate the replicability. The relative standard deviation (RSD) was considered for the present study (n=5). The acceptance threshold was fixed at 15% of RSD.

The results suggested that 3 (CAF, SMX and DCF) of the 9 studied compounds did not respect the acceptance threshold of  $\leq 15\%$ . Nonetheless, the respective values of 15.8, 16.3 and 20.7 for CAF, SMX and DCF were deemed satisfactory since like in any analysis, it is possible to exclude outliers. The goal of this test was to show that the method was replicable and not to develop a robust analytical method. Precise exclusion procedures were created for series of data which values were exceeding the acceptance threshold. These exclusion procedures were applied during all the degradation tests, without exception. An observation was deemed an outlier if it failed the Q test. Furthermore, when the RSD was  $> 15\%$  within a series of data, the value increasing the most the RSD was excluded, with a maximum of 1 data that can be excluded. Unlike all the other studied compounds which were quantified with 3 wells per sample, SMX and DCF were quantified with 5 wells to mitigate the lower replicability of their analysis.

**Table S6 Method limits of detection (LOD) and limits of quantification (LOQ) for the 9 target analytes in the aqueous systems tested**

| Compound | LOD [ $\mu\text{g L}^{-1}$ ] | LOQ [ $\mu\text{g L}^{-1}$ ] | LOD [ $\mu\text{g L}^{-1}$ ]           | LOQ [ $\mu\text{g L}^{-1}$ ] | LOD [ $\mu\text{g L}^{-1}$ ] | LOQ [ $\mu\text{g L}^{-1}$ ] |
|----------|------------------------------|------------------------------|----------------------------------------|------------------------------|------------------------------|------------------------------|
|          | dd-water                     |                              | 0.45 $\mu\text{m}$ surface river water |                              | (raw wastewater)             |                              |
| ATZ      | 3.7                          | 12.2                         | 3.7                                    | 12.2                         | 4.0                          | 13.2                         |
| DEA      | 1.0                          | 3.3                          | 1.0                                    | 3.3                          | 3.0                          | 9.9                          |
| E2       | 0.7                          | 2.3                          | 0.7                                    | 2.3                          | 5.0                          | 16.5                         |
| EE2      | 0.3                          | 1.1                          | 0.7                                    | 2.3                          | 2.5                          | 8.3                          |
| NOR      | 0.3                          | 0.9                          | 0.3                                    | 0.9                          | 3.0                          | 9.9                          |
| CAF      | 1.9                          | 6.3                          | 3.1                                    | 10.2                         | 10.0                         | 33.0                         |
| CBZ      | 0.2                          | 0.5                          | 0.2                                    | 0.5                          | 0.4                          | 1.3                          |
| SMX      | 1.0                          | 3.3                          | 2.2                                    | 7.3                          | 6.7                          | 22.1                         |
| DCF      | 2.5                          | 8.3                          | 1.3                                    | 4.3                          | 7.2                          | 23.8                         |

## S7. Degradation results

**Table S7 Exhaustive degradation results: Lag phases (Lp), pseudo first order disappearance rate constants (*k*) & half-lives ( $t_{1/2}$ )  $\pm$  standard deviation of duplicate incubations for the nine target compound in all conditions studied.**

| Compound | Water type tested              | 0.45 $\mu$ m filtered urban river (surface water) |                   | Raw wastewater (PST outlet) |                      |                      |                   |
|----------|--------------------------------|---------------------------------------------------|-------------------|-----------------------------|----------------------|----------------------|-------------------|
|          |                                | Characteristics of the incubation                 |                   | 4°C with biocides           | 4°C                  | 21.5°C with biocides | 21.5°C            |
|          |                                | 4°C                                               | 21°C              |                             |                      |                      |                   |
| ATZ      | -                              | <i>a</i>                                          | <i>a</i>          | <i>d</i>                    | <i>d</i>             | <i>d</i>             | <i>d</i>          |
| DEA      | -                              | <i>a</i>                                          | <i>a</i>          | <i>d</i>                    | <i>d</i>             | <i>d</i>             | <i>d</i>          |
| E2       | Lp [days]                      |                                                   | 5 $\leq$ Lp < 14  |                             | 2 $\leq$ Lp < 8      | 2 $\leq$ Lp < 43     | non significant   |
|          | <i>k</i> [days <sup>-1</sup> ] | <i>d</i>                                          | 0.128 $\pm$ 0.003 | <i>d</i>                    | 0.018 $\pm$ 0.004    | <i>f</i>             | 0.52 $\pm$ 0.01   |
|          | $t_{1/2}$ [days]               |                                                   | 5.4 $\pm$ 0.1     |                             | 40 $\pm$ 9           |                      | 1.30 $\pm$ 0.03   |
| EE2      | Lp [days]                      |                                                   |                   |                             |                      |                      | 26 $\leq$ Lp < 66 |
|          | <i>k</i> [days <sup>-1</sup> ] | <i>a</i>                                          | <i>a</i>          | <i>d</i>                    | <i>d</i>             | <i>d</i>             | 0.036 $\pm$ 0.003 |
|          | $t_{1/2}$ [days]               |                                                   |                   |                             |                      |                      | 19 $\pm$ 2        |
| NOR      | Lp [days]                      |                                                   |                   |                             | 8.5 $\leq$ Lp < 21.5 |                      | 0 $\leq$ Lp < 8.5 |
|          | <i>k</i> [days <sup>-1</sup> ] | <i>b</i>                                          | <i>b</i>          | <i>e</i>                    | 0.022 $\pm$ 0.002    | <i>e</i>             | 0.11 $\pm$ 0.00   |
|          | $t_{1/2}$ [days]               |                                                   |                   |                             | 32 $\pm$ 4           |                      | 6 $\pm$ 0         |
| CBZ      | -                              | <i>a</i>                                          | <i>a</i>          | <i>e</i>                    | <i>e</i>             | <i>e</i>             | <i>e</i>          |
| CAF      | Lp [days]                      |                                                   |                   |                             | 0 $\leq$ Lp < 8.5    |                      | 0 $\leq$ Lp < 8.5 |
|          | <i>k</i> [days <sup>-1</sup> ] | <i>a</i>                                          | <i>a</i>          | <i>c</i>                    | 0.011 $\pm$ 0.003    | <i>c</i>             | 0.037 $\pm$ 0.004 |
|          | $t_{1/2}$ [days]               |                                                   |                   |                             | 65 $\pm$ 20          |                      | 19 $\pm$ 2        |
| SMX      | Lp [days]                      |                                                   |                   |                             | 21.5 $\leq$ Lp < 71  |                      | 0 $\leq$ Lp < 8.5 |
|          | <i>k</i> [days <sup>-1</sup> ] | <i>a</i>                                          | <i>a</i>          | <i>c</i>                    | 0.0082 $\pm$ 0.0008  | <i>c</i>             | 0.035 $\pm$ 0.003 |
|          | $t_{1/2}$ [days]               |                                                   |                   |                             | 85 $\pm$ 8           |                      | 20 $\pm$ 2        |
| DCF      | -                              | <i>a</i>                                          | <i>a</i>          | <i>e</i>                    | <i>e</i>             | <i>e</i>             | <i>e</i>          |

No significant disappearance observed after <sup>a</sup>365, <sup>b</sup>156, <sup>c</sup>130, <sup>d</sup>72 or <sup>e</sup>66 days (experiment length).

<sup>f</sup> data excluded due to poor reproductibility.

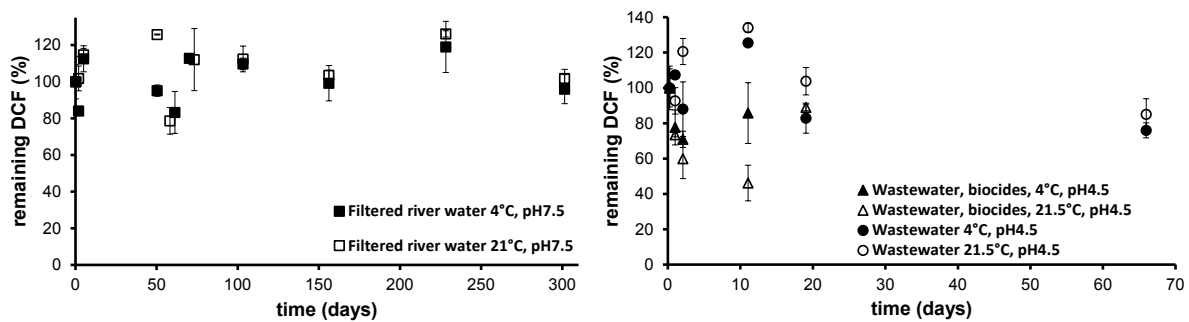

**Figure S4. Residual Diclofenac (%) over time (days) in a raw wastewater (PST outlet) with an initial spiked concentration of 400  $\mu\text{g L}^{-1}$ . Error bars represent relative standard deviation of duplicates measurements.**

## S8. Literature Review of Aquatic Degradation Data for the Studied Compounds

**Table S8 Reported values of degradation for the 9 studied compounds in different water systems<sup>a</sup>**

| Compound<br>(ref) | Studied system                                                                       | System characteristics                   | t <sub>1/2</sub> (days)                             | Degradation % in (time) | Implied<br>process |   |
|-------------------|--------------------------------------------------------------------------------------|------------------------------------------|-----------------------------------------------------|-------------------------|--------------------|---|
| ATZ <sup>2</sup>  |                                                                                      | dextrose as C <sub>external</sub> source |                                                     | 40 (5d)                 | B                  |   |
| ATZ <sup>2</sup>  | Anaerobic mixed growth medium                                                        | ∅ C <sub>external</sub> source           | n.a.                                                | 61.8 (34d)              | B                  |   |
| ATZ <sup>2</sup>  |                                                                                      | ∅ C & N <sub>external</sub> source       |                                                     | 42 (150d)               | B                  |   |
| ATZ <sup>2</sup>  | Aerobic <i>Agrobacterium radiobacter</i><br>growth medium (common soil<br>bacterium) | n.a.                                     | n.a.                                                | 94 (72h)                | B                  |   |
| ATZ <sup>3</sup>  | Aerobic river<br>sediments                                                           | water<br>0.8% C <sub>org</sub>           | 20                                                  |                         | B, H, O            |   |
| ATZ <sup>3</sup>  |                                                                                      | water:sediment<br>(extractible)          | 80                                                  | n.a.                    | B, H, O            |   |
| ATZ <sup>3</sup>  | Aerobic pond<br>sediments                                                            | eau<br>5% C <sub>org</sub>               | 14                                                  |                         | B, H, O            |   |
| ATZ <sup>3</sup>  |                                                                                      | water:sediment<br>(extractible)          | 35                                                  |                         | B, H, O            |   |
| ATZ <sup>3</sup>  | Aerobic water<br>downstream of a<br>sugar refinery                                   | 500 ml water : 12.5<br>g sediments       | 10 ppm sugar at 22°C                                | 100 (6w)                | B                  |   |
| ATZ <sup>3</sup>  | Aerobic distilled<br>water                                                           |                                          | at 22°C                                             | 100 (18w)               | B                  |   |
| ATZ <sup>3</sup>  | Anaerobic pond<br>water                                                              | 50 ml water : 25 g<br>sediments          | n.a.                                                | 608                     | n.a.               | G |
| ATZ <sup>3</sup>  | Saltwater                                                                            | n.a.                                     | n.a.                                                | 15-20                   | n.a.               | G |
| ATZ <sup>3</sup>  |                                                                                      |                                          | ph 5                                                | 1000                    |                    | H |
| ATZ <sup>3</sup>  |                                                                                      |                                          | ph 7                                                | none                    | n.a.               | H |
| ATZ <sup>3</sup>  | Sterile buffered water                                                               |                                          | ph 9                                                | 6600                    |                    | H |
| ATZ <sup>3</sup>  |                                                                                      |                                          | ∅ photo-sensitizer                                  | ≈335                    | n.a.               | P |
| ATZ <sup>3</sup>  |                                                                                      |                                          | with photo-sensitizer                               | <<< 335                 | n.a.               | P |
| ATZ <sup>4</sup>  |                                                                                      |                                          | ATZ 1500 ppb, ph 5, 25°C                            | 69.6                    | n.a.               | H |
| ATZ <sup>4</sup>  | EU Method C.7 (Degradation: Abiotic<br>Degradation: H as a Function of ph)           |                                          | ATZ 1500 ppb, ph 5, 60°C                            | 6.6                     | n.a.               | H |
| ATZ <sup>4</sup>  |                                                                                      |                                          | ATZ 1500 ppb, ph 5, 70°C                            | 3.7                     | n.a.               | H |
| ATZ <sup>5</sup>  | Synthetic river water, ph 6.4 (aerobic)                                              |                                          | ATZ 500 ppb, reactor operated in<br>continuous mode | none                    | n.a.               | B |
| ATZ <sup>5</sup>  | Synthetic river water , ph 6.4<br>(anaerobic)                                        |                                          |                                                     | none                    | n.a.               | B |

|                   |                                                               |                                                                           |                                  |        |                                                                                                                                                                                                       |   |
|-------------------|---------------------------------------------------------------|---------------------------------------------------------------------------|----------------------------------|--------|-------------------------------------------------------------------------------------------------------------------------------------------------------------------------------------------------------|---|
| ATZ <sup>6</sup>  |                                                               |                                                                           | 0.02M phosphate buffer (sterile) |        |                                                                                                                                                                                                       | C |
| ATZ <sup>6</sup>  |                                                               |                                                                           | soil                             |        | 17-57% (1w); the amounts of dealkylated metabolites generally did not exceed those of sterile solutions. The results indicate that atrazine is not degraded by bacteria but bound, thus simulating B. | B |
| ATZ <sup>6</sup>  | Media enriched (ph 7.2) with mixed bacterial populations from |                                                                           | water                            |        |                                                                                                                                                                                                       | B |
| ATZ <sup>6</sup>  |                                                               |                                                                           | activated sludge                 |        |                                                                                                                                                                                                       | B |
| ATZ <sup>7</sup>  | Estuarine water                                               | water                                                                     | aerobic, natural light           | 3-12   | n.a.                                                                                                                                                                                                  | P |
| ATZ <sup>7</sup>  |                                                               | sediments                                                                 |                                  | 15-20  |                                                                                                                                                                                                       | P |
| ATZ <sup>8</sup>  | Aqueous systems                                               | waters in general                                                         | n.a.                             | >>365  | n.a.                                                                                                                                                                                                  | P |
| ATZ <sup>9</sup>  |                                                               | Aqueous system                                                            | ph 7.0, natural light            | 335    | n.a.                                                                                                                                                                                                  | P |
| ATZ <sup>9</sup>  | Autoclaved estuarine and marine water                         |                                                                           | n.a.                             | n.a.   | persistent (128d)                                                                                                                                                                                     | C |
| ATZ <sup>9</sup>  |                                                               | River water                                                               | n.a.                             | n.a.   | 17% (128d)                                                                                                                                                                                            | G |
| ATZ <sup>9</sup>  |                                                               | River estuary surrounded by an agricultural watershed (corn)              |                                  | 30     | n.a.                                                                                                                                                                                                  | G |
| ATZ <sup>9</sup>  | Field or microcosm evaluations                                |                                                                           | Estuarine conditions             | 30     | n.a.                                                                                                                                                                                                  | G |
| ATZ <sup>9</sup>  |                                                               | Estuarine microcosm (river surrounded by an agricultural watershed (corn) |                                  | 90-120 | n.a.                                                                                                                                                                                                  | G |
| ATZ <sup>9</sup>  |                                                               | Estuarine microcosm (river surrounded by an agricultural watershed (corn) |                                  | 90-120 | n.a.                                                                                                                                                                                                  | G |
| ATZ <sup>9</sup>  |                                                               |                                                                           | 25 °C, ph 4                      | 244    | n.a.                                                                                                                                                                                                  | H |
| ATZ <sup>9</sup>  |                                                               |                                                                           | 25 °C, ph 4, 2% humic acid       | 1.73   | n.a.                                                                                                                                                                                                  | H |
| ATZ <sup>9</sup>  |                                                               |                                                                           | ph 2.9, 5 mg/L fulvic acid       | 34.8   | n.a.                                                                                                                                                                                                  | H |
| ATZ <sup>9</sup>  | <sup>9</sup> Laboratory aqueous Systems                       |                                                                           | ph 4.5, 5 mg/L fulvic acid       | 174    | n.a.                                                                                                                                                                                                  | H |
| ATZ <sup>9</sup>  |                                                               |                                                                           | ph 6.0, 5 mg/L fulvic acid       | 398    | n.a.                                                                                                                                                                                                  | H |
| ATZ <sup>9</sup>  |                                                               |                                                                           | ph 7.0, 5 mg/L fulvic acid       | 742    | n.a.                                                                                                                                                                                                  | H |
| ATZ <sup>9</sup>  |                                                               |                                                                           | ph 5.0-7.0                       | n.a.   | persistent (30d)                                                                                                                                                                                      | H |
| DEA <sup>10</sup> | Potable water                                                 | n.a.                                                                      | n.a.                             | n.a.   | persistent (10d)                                                                                                                                                                                      | G |
| DEA <sup>11</sup> | Groundwater microcosm under low O <sub>2</sub> conditions     |                                                                           | DEA~20 µg/L, DO <3.0 mg/L        | n.a.   | persistent (45d)                                                                                                                                                                                      | G |
| DEA <sup>12</sup> | Aerobic aquifer                                               |                                                                           | DEA~3 µg/L, DO~6.9 mg/L          | n.a.   | persistent (60d)                                                                                                                                                                                      | G |
| E2 <sup>13</sup>  | Aerobic digestion unit                                        | mud                                                                       |                                  | n.a.   | 88 (24h)                                                                                                                                                                                              | B |

|                      |                                            |                      |                                                                                                                        |                                                   |                     |                  |       |
|----------------------|--------------------------------------------|----------------------|------------------------------------------------------------------------------------------------------------------------|---------------------------------------------------|---------------------|------------------|-------|
| E2 <sup>13</sup>     | Anaerobic digestion unit                   | mud                  |                                                                                                                        | 7                                                 | n.a.                | B                |       |
| E2 <sup>13</sup>     | Bioreactor                                 | n.a.                 |                                                                                                                        | n.a.                                              | 92 (7h) & 100 (49h) | B                |       |
| E2 <sup>14</sup>     | Aerobic river water                        |                      | 20 °C                                                                                                                  | n.a.                                              | 100 (1.2d)          | B                |       |
| EE2 <sup>14</sup>    |                                            |                      |                                                                                                                        |                                                   | 17 (1.2d)           | B                |       |
| E2 <sup>15</sup>     | Aerobic marine water                       |                      | 20 °C                                                                                                                  | complete degradation in 14d after a 28d lag phase |                     | B                |       |
| EE2 <sup>15</sup>    |                                            |                      |                                                                                                                        |                                                   |                     | B                |       |
| E2 <sup>15</sup>     | Anaerobic marine water                     |                      |                                                                                                                        | none                                              | n.a.                | B                |       |
| EE2 <sup>15</sup>    |                                            |                      |                                                                                                                        |                                                   |                     | B                |       |
| E2 <sup>14</sup>     | Aerobic industrial, urban and rural waters |                      | pH 7.1-8.4, DOC 2.9-10.3 mg/L, TSS 5.2-83 mg/L, bacterium 3x10 <sup>6</sup> -3.5x10 <sup>8</sup> cfu/L, 20 °C          | 0.2-9                                             | n.a.                | B                |       |
| EE2 <sup>14</sup>    |                                            |                      |                                                                                                                        | more persistent than E2                           | B                   |                  |       |
| E2/EE2 <sup>14</sup> |                                            |                      |                                                                                                                        | 5                                                 | n.a.                | P                |       |
| E2/EE2 <sup>14</sup> |                                            |                      |                                                                                                                        | sterile                                           | none                | persistent (16d) | H + O |
| E2 <sup>16</sup>     | English river waters                       |                      | Water column, initially aerobic but potentially decreasing oxic conditions, 20 °C                                      | 2-3                                               |                     | B                |       |
| EE2 <sup>16</sup>    |                                            |                      |                                                                                                                        | 4-6                                               | n.a.                | B                |       |
| E2/EE2 <sup>16</sup> |                                            |                      |                                                                                                                        | sterile                                           | none                | persistent       | H + O |
| E2 <sup>17</sup>     | Potable water                              |                      |                                                                                                                        | n.a.                                              | 38.9 (10d)          | G                |       |
| EE2 <sup>17</sup>    |                                            |                      |                                                                                                                        |                                                   | 22.4 (10d)          | G                |       |
| E2 <sup>18</sup>     | Japanese river waters                      |                      | 15 °C (winter)                                                                                                         | n.a.                                              | 100 (7d)            | B                |       |
| E2 <sup>18</sup>     |                                            |                      |                                                                                                                        | 28 °C (summer)                                    | n.a.                | 100 (5d)         | B     |
| EE2 <sup>18</sup>    |                                            |                      |                                                                                                                        | 15 °C (winter)                                    | >>14                | n.a.             | B     |
| EE2 <sup>18</sup>    |                                            |                      |                                                                                                                        | 28 °C (summer)                                    | 14                  | n.a.             | B     |
| E2/EE2 <sup>18</sup> |                                            | sterile              | none                                                                                                                   |                                                   | persistent (5d)     | H + O            |       |
| CBZ <sup>19</sup>    | Aquatic microcosm of 12,000 L held outside |                      | unspecified T(°C) and O <sub>2</sub> – communities of fish, aquatic plant, zoo-, phytoplankton, macrophyte & bacterium | n.a.                                              | not significant     | H                |       |
| CBZ <sup>19</sup>    |                                            |                      |                                                                                                                        | n.a.                                              | not significant     | B                |       |
| CBZ <sup>19</sup>    |                                            |                      |                                                                                                                        | 82                                                | n.a.                | P                |       |
| CBZ <sup>20</sup>    | Stream muddy water                         |                      | pH 8,5, TOC 4,7 mg/L                                                                                                   | 47                                                |                     | B                |       |
| CBZ <sup>20</sup>    | water (oxic, darkness, 20°C)               | 3 water : 1 sediment | pH 7,7, 1.4% C <sub>org</sub> ,                                                                                        | 328                                               | n.a.                | B                |       |
| CBZ <sup>21</sup>    | Double-distilled water                     |                      | naturally irradiated in spring, 40°N, pH 5,5 at 25 °C                                                                  | 5.1                                               | n.a.                | P                |       |

|                   |                                                                                            |                                                                                                                        |        |                                  |       |
|-------------------|--------------------------------------------------------------------------------------------|------------------------------------------------------------------------------------------------------------------------|--------|----------------------------------|-------|
| CBZ <sup>22</sup> | Double-distilled water                                                                     | naturally irradiated in winter, 40°N, pH 5,5 at 25 °C                                                                  | 100    | n.a.                             | P     |
| CBZ <sup>23</sup> | 11 australian wastewaters ( primary settling tanks, activated sludge, anaerobic digestion) | bacterial beds aged between 1 and 40 days, oxic and anoxic conditions                                                  | n.a.   | not significant during treatment | B     |
| CBZ <sup>24</sup> |                                                                                            | pH 5 at 25°C                                                                                                           | > 365  |                                  | H     |
| CBZ <sup>24</sup> | Aqueous systems (Estimation Program Interface)                                             | pH 7 at 25°C                                                                                                           | > 365  | n.a.                             | H     |
| CBZ <sup>24</sup> |                                                                                            | pH 9 at 25°C                                                                                                           | > 365  |                                  | H     |
| CAF <sup>19</sup> |                                                                                            |                                                                                                                        | n.a.   | not significant                  | H     |
| CAF <sup>19</sup> | Aquatic microcosm of 12,000 L held outside                                                 | unspecified T(°C) and O <sub>2</sub> – communities of fish, aquatic plant, zoo-, phytoplankton, macrophyte & bacterium | n.a.   | not significant                  | B     |
| CAF <sup>19</sup> |                                                                                            |                                                                                                                        | 1-2    | n.a.                             | P     |
| CAF <sup>25</sup> |                                                                                            | sterile (darkness) at 20°C                                                                                             | nulle  | persistent                       | H + O |
| CAF <sup>25</sup> |                                                                                            | sterile at 20°C                                                                                                        | 12.8   | n.a.                             | P     |
| CAF <sup>25</sup> | Lake water                                                                                 | natural (darkness) at 20°C                                                                                             | >120   | n.a.                             | B     |
| CAF <sup>25</sup> |                                                                                            | natural at 20°C                                                                                                        | 12     | n.a.                             | P + B |
| CAF <sup>26</sup> | WWTP primary inlet                                                                         | BOD 67 mg/L, TSS 76 mg/L, pH 7, 19 °C                                                                                  | ~1     | ≈100 (3d)                        | B     |
| CAF <sup>26</sup> | WWTP outlet                                                                                | BOD 3.6 mg/L, TSS 7.9 mg/L, pH 6.4, 19 °C                                                                              | ~5     | ≈100 (10d)                       | B     |
| CAF <sup>27</sup> |                                                                                            | oxic, 23 °C                                                                                                            |        | 20-90 (2d)                       | B     |
| CAF <sup>27</sup> | Sediments upstream of 3 WWTP                                                               | anoxic, 23 °C                                                                                                          | n.a.   | 85-98 (32d)                      | B     |
| CAF <sup>27</sup> | Waters upstream of 2 WWTP                                                                  | oxic, 23 °C                                                                                                            | none   | not significant                  | B     |
| CAF <sup>27</sup> | Water upstream of a WWTP                                                                   |                                                                                                                        | n.a.   | 100 (46d)                        | B     |
| CAF <sup>24</sup> |                                                                                            | pH 5 at 25°C                                                                                                           | 30-500 |                                  | H     |
| CAF <sup>24</sup> | Aqueous systems (Estimation Program Interface)                                             | pH 7 at 25°C                                                                                                           | 30-500 | n.a.                             | H     |
| CAF <sup>24</sup> |                                                                                            | pH 9 at 25°C                                                                                                           | 1-70   |                                  | H     |
| SMX <sup>19</sup> |                                                                                            |                                                                                                                        | n.a.   | not significant                  | H     |
| SMX <sup>19</sup> | Aquatic microcosm of 12,000 L held outside                                                 | unspecified T(°C) and O <sub>2</sub> – communities of fish, aquatic plant, zoo-, phytoplankton, macrophyte & bacterium | n.a.   | not significant                  | B     |
| SMX <sup>19</sup> |                                                                                            |                                                                                                                        | 19     | n.a.                             | P     |



|                   |                                                                                              |                                            |                                             |                  |                  |       |
|-------------------|----------------------------------------------------------------------------------------------|--------------------------------------------|---------------------------------------------|------------------|------------------|-------|
| SMX <sup>26</sup> | WWTP primary inlet                                                                           | BOD 67 mg/L, TSS 76 mg/L, pH 7, 19 °C      | ~18.                                        | 90 (25d)         | B                |       |
| SMX <sup>26</sup> | WWTP outlet                                                                                  | BOD 3.6 mg/L, TSS 7.9 mg/L, pH 6.4, 19 °C  | none                                        | persistent (56d) | B                |       |
| SMX <sup>28</sup> | Synthetic system                                                                             | 3 water : 1 sediment                       | unspecified O <sub>2</sub> , 25 °C          | 14               | n.a.             | B     |
| SMX <sup>28</sup> |                                                                                              |                                            | sterile, 25 °C                              | 115              |                  | B     |
| SNX <sup>29</sup> | Natural waters (initial O <sub>2</sub> of 7.8 mg/L, no air bubbling and no bottle headspace) |                                            | sterile (darkness)                          | none             | persistent       | H     |
| SMX <sup>29</sup> |                                                                                              |                                            | sterile                                     | 48.9             |                  | P     |
| SMX <sup>29</sup> |                                                                                              |                                            | natural (darkness)                          | 47.4             | n.a.             | B     |
| SMX <sup>29</sup> |                                                                                              |                                            | natural                                     | 7.3              |                  | B + P |
| SMX <sup>29</sup> |                                                                                              |                                            | sterile (darkness)                          | none             | persistent       | H     |
| SMX <sup>29</sup> | Sediment slurry (4.7% C <sub>org</sub> )                                                     |                                            | sterile                                     | 47.3             |                  | P     |
| SMX <sup>29</sup> |                                                                                              |                                            | natural (darkness)                          | 10.1             | n.a.             | B     |
| SMX <sup>29</sup> |                                                                                              |                                            | natural                                     | 4.9              |                  | B + P |
| SMX <sup>22</sup> | Double-distilled water                                                                       |                                            | natural irradiation in winter, 50°N, pH 5,5 | 2.4              | n.a.             | P     |
| DCF <sup>22</sup> | Double-distilled water                                                                       |                                            | natural irradiation in winter, 50°N, pH 5,5 | 5                | n.a.             | P     |
| DCF <sup>30</sup> | Liquid phases of WWTP sludges (0.5 g TSS/L)                                                  |                                            | sterile                                     | n.a.             | persistent       | H     |
| DCF <sup>30</sup> |                                                                                              |                                            | aerobic, pH 5.5-7.3, 20°C                   | n.a.             | persistent       | B     |
| DCF <sup>31</sup> | Aerobic synthetic wastewater                                                                 | (10 mg activated sludge/L deionized water) |                                             | none             | persistent (28d) | B     |
| DCF <sup>32</sup> | Lake surface waters                                                                          |                                            | n.a.                                        | n.a.             | 90 (1h)          | P     |
| DCF <sup>32</sup> |                                                                                              |                                            | darkness                                    | none             | persistent (37d) | H + B |

<sup>a</sup> Classification symbols are h = hours, d = days, w = weeks, B = biodegradation, H = hydrolysis, O = oxidation, G = general degradation, P = photolysis and C = chemical degradation

## References

1. S. Simkins and M. Alexander, *Applied and Environmental Microbiology*, 1984, **47**, 1299-1306.
2. P. K. Ghosh and L. Philip, *Global NEST Journal*, 2006, **8**, 159-178.
3. S. Canard, *Devenir de l'atrazine dans l'environnement: Étude bibliographique*, ENVT: Toulouse, 2003.
4. European Chemicals Agency (ECHA), Atrazine [http://apps.echa.europa.eu/registered/data/dossiers/DISS-a64ee5e9-8e4d-2576-e044-00144f67d249/AGGR-3213ca90-30b9-4691-bf54-ffff5167e45\\_DISS-a64ee5e9-8e4d-2576-e044-00144f67d249.html#AGGR-3213ca90-30b9-4691-bf54-ffff5167e45](http://apps.echa.europa.eu/registered/data/dossiers/DISS-a64ee5e9-8e4d-2576-e044-00144f67d249/AGGR-3213ca90-30b9-4691-bf54-ffff5167e45_DISS-a64ee5e9-8e4d-2576-e044-00144f67d249.html#AGGR-3213ca90-30b9-4691-bf54-ffff5167e45), (accessed July 15, 2015).
5. D. Dries, B. De Corte, J. Liessens, W. Steurbaut, W. Dejonckhere and W. Verstraete, *Biotechnology letters*, 1987, **9**, 811-816.
6. A. Geller, *Archives of environmental contamination and toxicology*, 1980, **9**, 289-305.
7. T. W. Jones, W. M. Kemp, J. C. Stevenson and J. C. Means, *Journal of Environmental Quality*, 1982, **11**, 632-638.
8. National Registration Authority for Agricultural and Veterinary Chemicals, *The NRA Review of Atrazine: Review Summary*, NRA: Canberra, 1997.
9. K. R. Solomon, D. B. Baker, R. P. Richards, K. R. Dixon, S. J. Klaine, T. W. La Point, R. J. Kendall, C. P. Weisskopf, J. M. Giddings, J. P. Giesy, L. W. Hall and W. M. Williams, *Environmental Toxicology and Chemistry*, 1996, **15**, 31-76.
10. K. Aboufadi, C. De Potter, M. Prévost and S. Sauvé, *Chemistry Central Journal*, 2010, **4**, 1-8.
11. S. K. Papiernik and R. F. Spalding, *Journal of agricultural and food chemistry*, 1998, **46**, 749-754.
12. S. K. Widmer and R. F. Spalding, *Journal of Environmental Quality*, 1995, **24**, 445-453.
13. H. B. Lee and D. Liu, *Water, Air, & Soil Pollution*, 2002, **134**, 351-366.
14. M. D. Jürgens, K. I. E. Holthaus, A. C. Johnson, J. J. L. Smith, M. Hetheridge and R. J. Williams, *Environmental Toxicology and Chemistry*, 2002, **21**, 480-488.
15. G.-G. Ying and R. S. Kookana, *Environmental Science & Technology*, 2003, **37**, 1256-1260.
16. R. J. Williams, M. D. Jürgens and A. C. Johnson, *Water Research*, 1999, **33**, 1663-1671.
17. M. D. Jürgens, Williams, R. J. and Johnson, A. C, *Fate and behaviour potential of steroid estrogens in rivers: a scoping study*, Institute of Hydrology, 1999.
18. S. Matsuoka, M. Kikuchi, S. Kimura, Y. Kurokawa and S. i. Kawai, *Journal of Health Science*, 2005, **51**, 178-184.
19. M. W. Lam, C. J. Young, R. A. Brain, D. J. Johnson, M. A. Hanson, C. J. Wilson, S. M. Richards, K. R. Solomon and S. A. Mabury, *Environmental Toxicology and Chemistry*, 2004, **23**, 1431-1440.
20. D. Löffler, J. Römbke, M. Meller and T. A. Ternes, *Environmental Science & Technology*, 2005, **39**, 5209-5218.
21. R. Andreatti, R. Marotta, G. Pinto and A. Pollio, *Water Research*, 2002, **36**, 2869-2877.

22. R. Andreozzi, M. Raffaele and P. Nicklas, *Chemosphere*, 2003, **50**, 1319-1330.
23. M. Clara, B. Strenn and N. Kreuzinger, *Water Research*, 2004, **38**, 947-954.
24. United States Environmental Protection Agency, *Estimation Programs Interface Suite™ for Microsoft® Windows, v 4.11*, United States Environmental Protection Agency, Washington, DC, USA., 2015.
25. I. J. Buerge, T. Poiger, M. D. Müller and H.-R. Buser, *Environmental Science & Technology*, 2003, **37**, 691-700.
26. S. Pérez, P. Eichhorn and D. S. Aga, *Environmental Toxicology and Chemistry*, 2005, **24**, 1361-1367.
27. P. M. Bradley, L. B. Barber, D. W. Kolpin, P. B. McMahon and F. H. Chapelle, *Environmental Toxicology and Chemistry*, 2007, **26**, 1116-1121.
28. B. Xu, D. Mao, Y. Luo and L. Xu, *Bioresource Technology*, 2011, **102**, 7069-7076.
29. H.-T. Lai and J.-H. Hou, *Aquaculture*, 2008, **283**, 50-55.
30. K. Kimura, H. Hara and Y. Watanabe, *Environmental science & technology*, 2007, **41**, 3708-3714.
31. J. B. Quintana, S. Weiss and T. Reemtsma, *Water Research*, 2005, **39**, 2654-2664.
32. H.-R. Buser, T. Poiger and M. D. Müller, *Environmental science & technology*, 1998, **32**, 3449-3456.
